# Supplementary material for: The Insect Pathogen Serratia marcescens Db10 Uses a Hybrid Non-Ribosomal Peptide Synthetase-Polyketide Synthase to Produce the Antibiotic Althiomycin
Source: PubMed Central journal article supplement (PMC3445576; doi:10.1371/journal.pone.0044673), 2012-09-18
Supplement: pone.0044673.s005.pdf [file pone.0044673.s005.pdf]

## Supporting Table S3

Table S3. NMR assignment for althiomycin (DMSO-d<sub>6</sub>, 700MHz, 25°C)

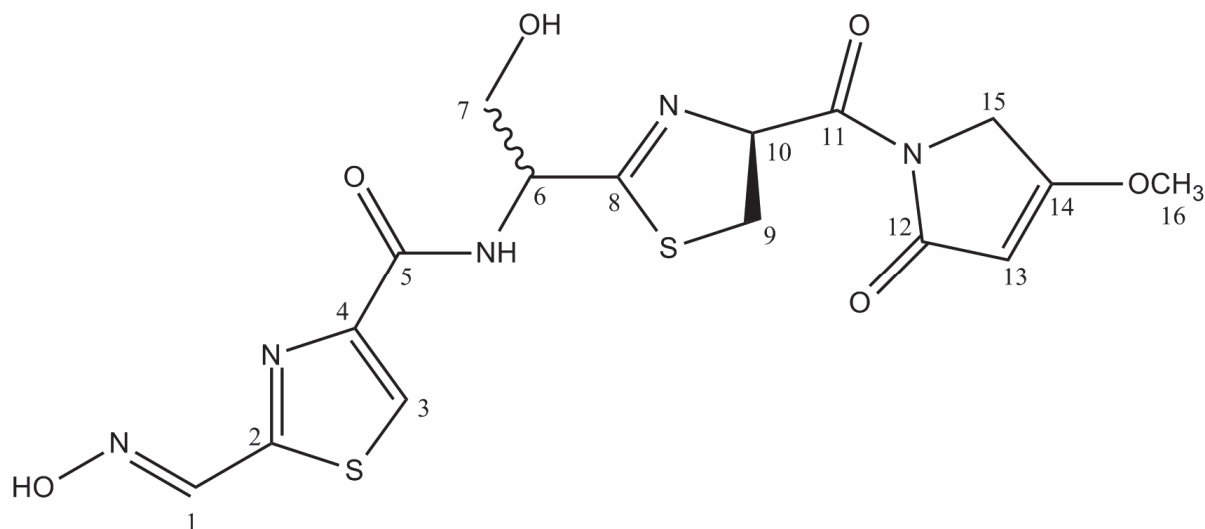

| Carbon   | $\delta_{\text{H}}$ (ppm) | $\delta_{\text{C}}$ (ppm)* | HMBC               | Literature**              |                           |
|----------|---------------------------|----------------------------|--------------------|---------------------------|---------------------------|
|          |                           |                            |                    | $\delta_{\text{H}}$ (ppm) | $\delta_{\text{C}}$ (ppm) |
| 1        | 8.37(s)                   | 143.0                      | C2                 | <b>8.37(s)</b>            | <b>143.2</b>              |
| 2        |                           | 162.6                      |                    |                           | <b>162.6</b>              |
| 3        | 8.29 (s)                  | 124.8                      | C2, C5             | <b>8.35(s)</b>            | <b>125.3</b>              |
| 4        |                           | 149.6                      |                    |                           | <b>149.7</b>              |
| 5        |                           | 160.4                      |                    |                           | <b>159.8</b>              |
| C5-NH-C6 | 8.39(br)                  |                            | C5, C6             | <b>8.41(m)</b>            |                           |
| 6        | 4.84(m)                   | 53.5                       | C5, C7, C8         | <b>4.88(m)</b>            | <b>53.9</b>               |
| 7        | 3.79(m)                   | 61.8                       | C6, C8             | <b>3.80(m)</b>            | <b>62.2</b>               |
| 8        |                           | 173.5                      |                    |                           | <b>173.4</b>              |
| 9        | 3.40/3.58(m)              | 34.9                       | C8, C10, C11       | <b>3.40/3.58(m)</b>       | <b>34.6</b>               |
| 10       | 6.14(t, 8.6)              | 77.8                       | C8, C9, C11        | <b>6.16(m)</b>            | <b>78.0</b>               |
| 11       |                           | 168.1                      |                    |                           | <b>168.3</b>              |
| 12       |                           | 169.5                      |                    |                           | <b>169.6</b>              |
| 13       | 5.39(s)                   | 94.3                       | C12, C15, C16      | <b>5.43(m)</b>            | <b>94.4</b>               |
| 14       |                           | 177.2                      |                    |                           | <b>177.2</b>              |
| 15       | 4.29(s)                   | 47.9                       | C11, C12, C13, C14 | <b>4.33(m)</b>            | <b>48.0</b>               |
| 16       | 3.88(s)                   | 58.9                       | C14                | <b>3.88(s)</b>            | <b>59.2</b>               |

\* Carbon shift obtained from HSQC and HMBC

\*\*Reference:

Cortina NS, Revermann O, Krug D, Muller R (2011) Identification and characterization of the althiomycin biosynthetic gene cluster in *Myxococcus xanthus* DK897. *Chembiochem* 12: 1411-1416.
